# Supplementary material for: Neural circuit mechanisms of hierarchical sequence learning tested on large-scale recording data
Source: PubMed Central journal article supplement (PMC9249189; doi:10.1371/journal.pcbi.1010214), 2022-06-21
Supplement: pcbi.1010214.s007.pdf [file pcbi.1010214.s007.pdf]

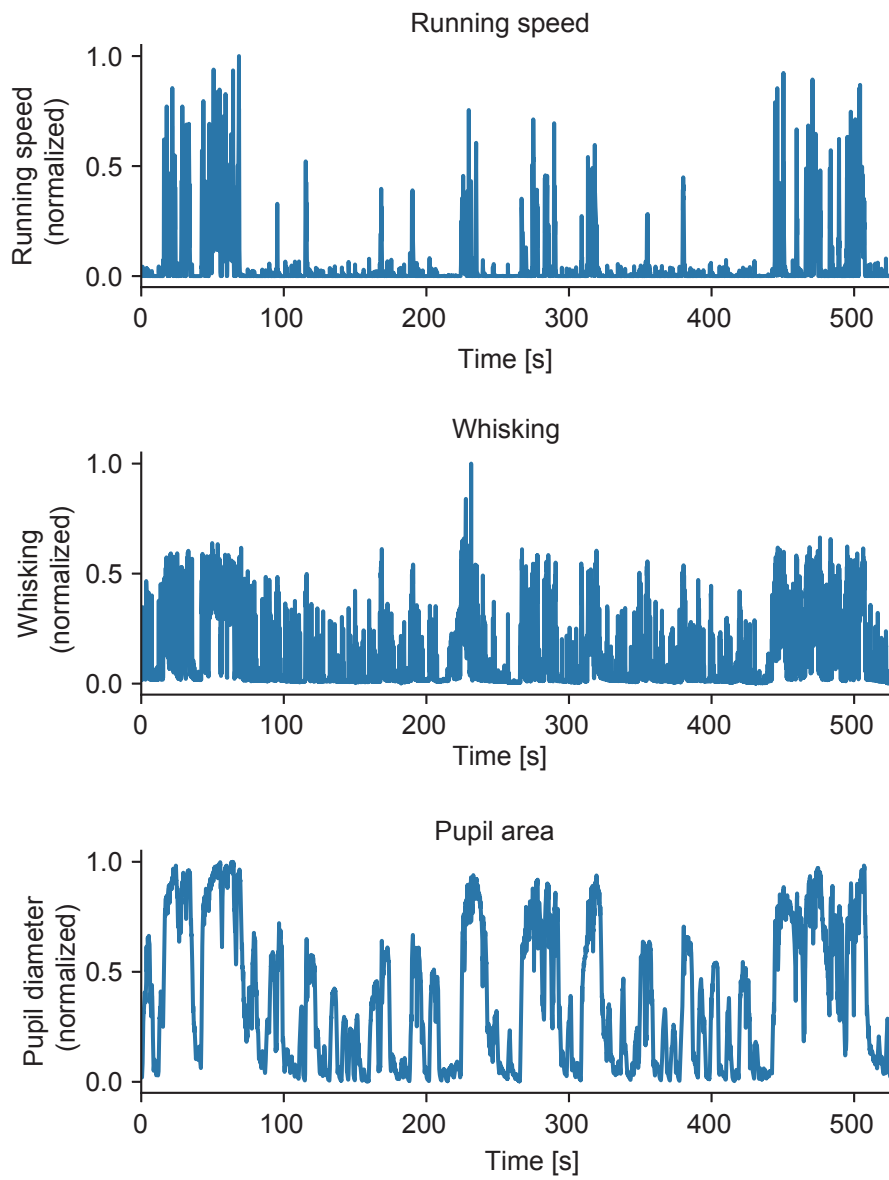

**S7 Fig. Behaviors of freely behaving mouse.** Running speed (top), whisking (middle), and pupil area (bottom) of freely behaving mouse are shown.
